# Supplementary material for: Caspase-1 Deficiency Modulates Adipogenesis through Atg7-Mediated Autophagy: An Inflammatory-Independent Mechanism
Source: MDPI journal article supplement (doi:10.3390/biom14040501), 2024-04-20

**Supplementary Table S1**

Primers used in this research.

| Primer Name      | Sequence(5' to 3')        |
|------------------|---------------------------|
| Caspase-1 F      | ATACAACCACTCGTACACGTCTTG  |
| Caspase-1 R      | CAGATCCTCCAGCAGCAACTTC    |
| 18S F            | CGCCGCTAGAGGTGAAATTCT     |
| 18S R            | CATTCTTGGCAAATGCTTTTCG    |
| C/EBP $\alpha$ F | CAAGAACAGCAACGAGTACCG     |
| C/EBP $\alpha$ R | GTCACTGGTCAACTCCAGCAC     |
| FABP4 F          | ACACCGAGATTTCTTCAAACCTG   |
| Fabp4 R          | CCATCTAGGGTTATGATGCTCTTCA |
| PPAR $\gamma$ F  | GTGCCAGTTTCGATCCGTAGA     |
| PPAR $\gamma$ R  | GGCCAGCATCGTGTAGATGA      |
| Adipoq F         | TGGAGAAGCCGCTTATGTGTATCG  |
| Adipoq R         | TGCTGCCGTCATAATGATTCTGTTG |
| Atg3 F           | GGCAGTTTTTGACTCCCCTG      |
| Atg3 R           | TTCCCCTGTAGCCCTCTTCT      |
| Atg4d F          | CCCCGGCATTCACTGTACTT      |
| Atg4d R          | TGGCAAAGGCCATCTCCAG       |
| Atg5 F           | TGTGCTTCGAGATGTGTGGTT     |
| Atg5 R           | GTCAAATAGCTGACTCTTGGCAA   |
| Atg7 F           | GCTGCTGAGATCTGGGACAT      |
| Atg7 R           | GAGATGTGGAGATCAGGACCAG    |
| Atg16l1 F        | TCCGAATCTCCCCTTTTGGGA     |
| Atg16l1 R        | CTGCACTGCGTTGACCTCTC      |

**Supplementary Figure S1.** Original Western blot images in Figure 1H.

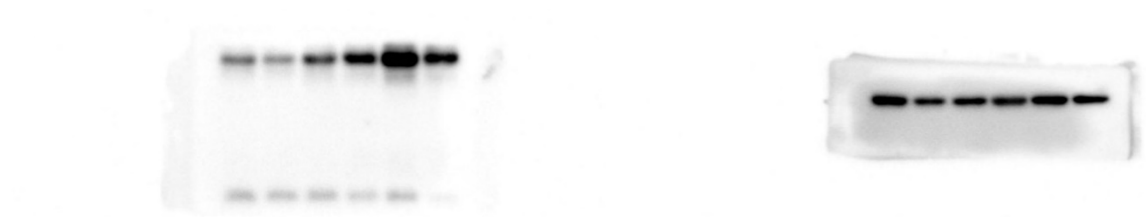

**Supplementary Figure S2.** Original Western blot images in Figure 1L.

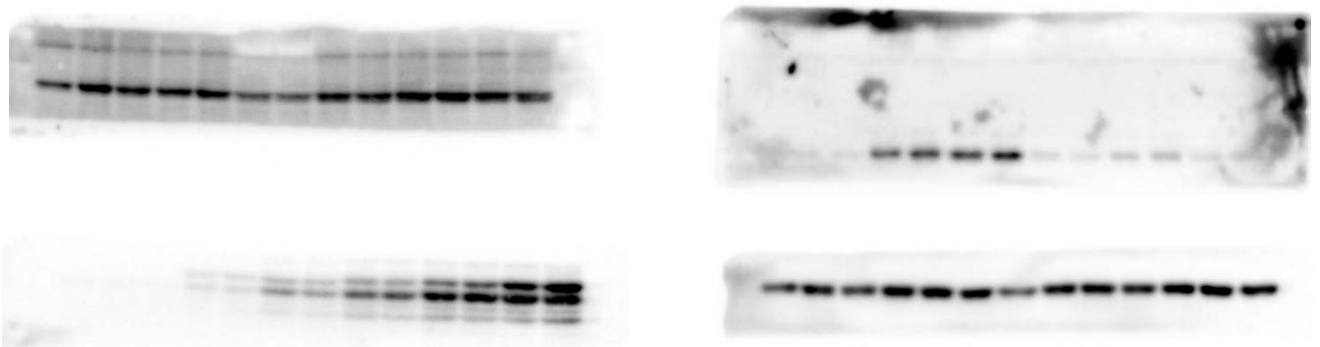

**Supplementary Figure S3.** Original Western blot images in Figure 3F.

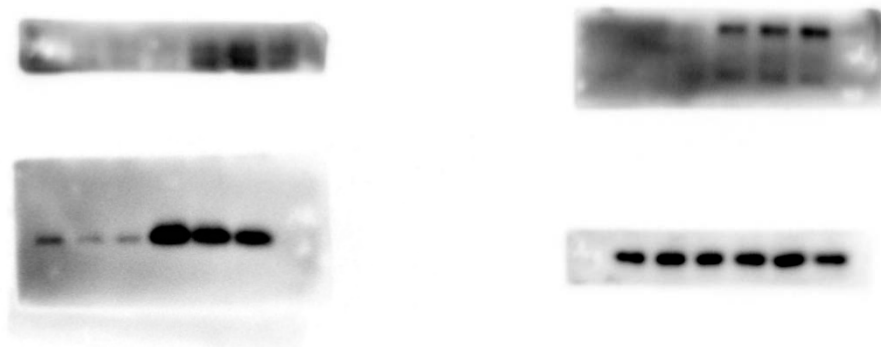

**Supplementary Figure S4.** Original Western blot images in Figure 3K.

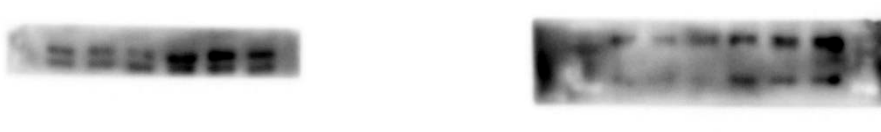

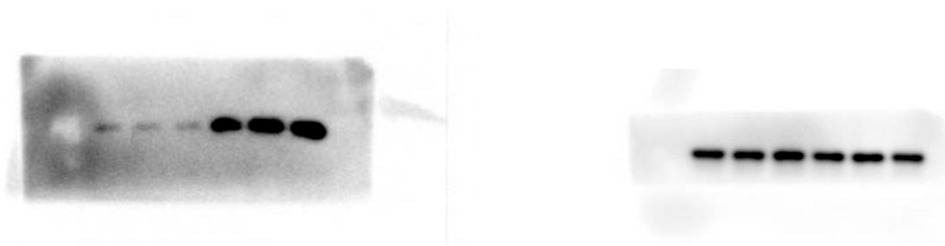

**Supplementary Figure S5.** Original Western blot images in Figure 4B.

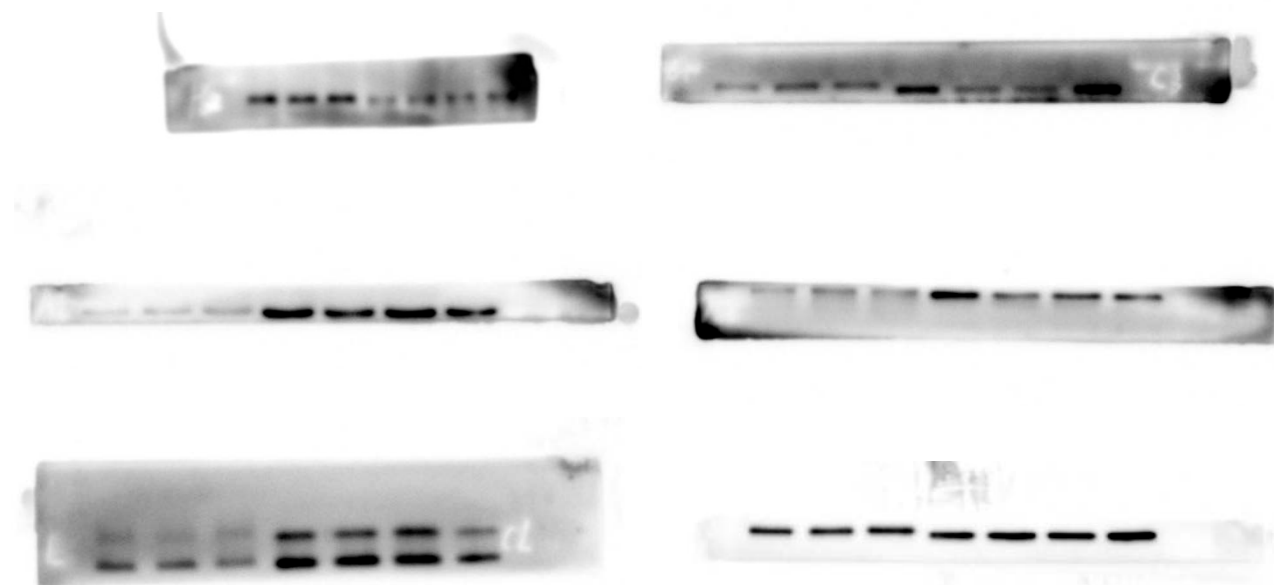

**Supplementary Figure S6.** Original Western blot images in Figure 4E.

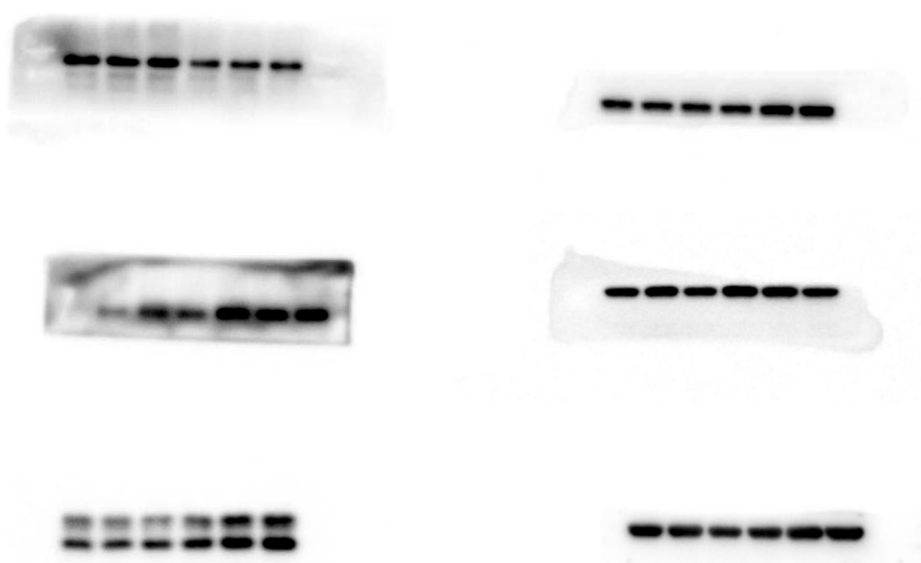

**Supplementary Figure S7.** Original Western blot images in Figure 5C.

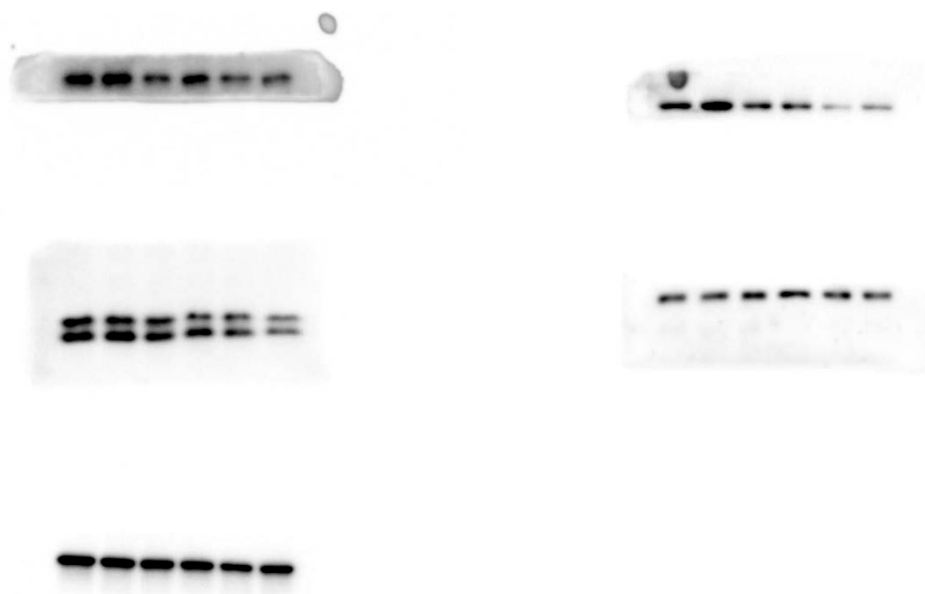

**Supplementary Figure S8.** Original Western blot images in Figure 5E.

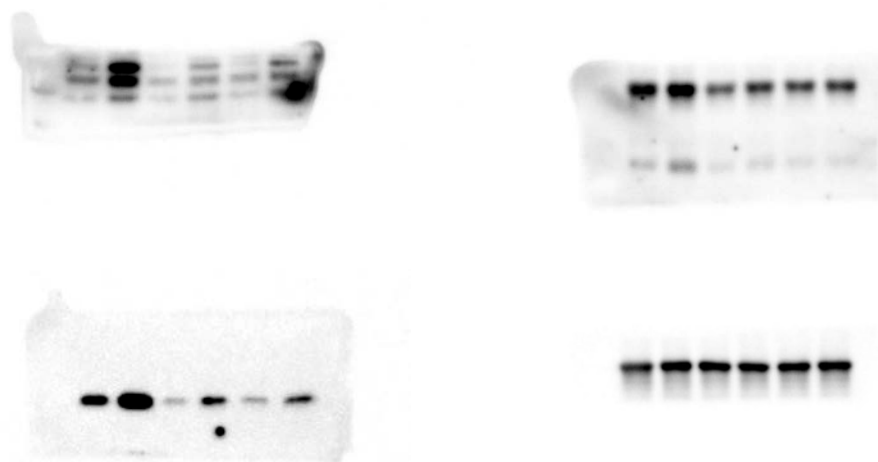

**Supplementary Figure S9.** Original Western blot images in Figure 6B.

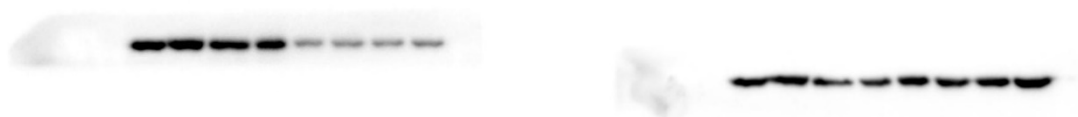

**Supplementary Figure S10.** Original Western blot images in Figure 6F.

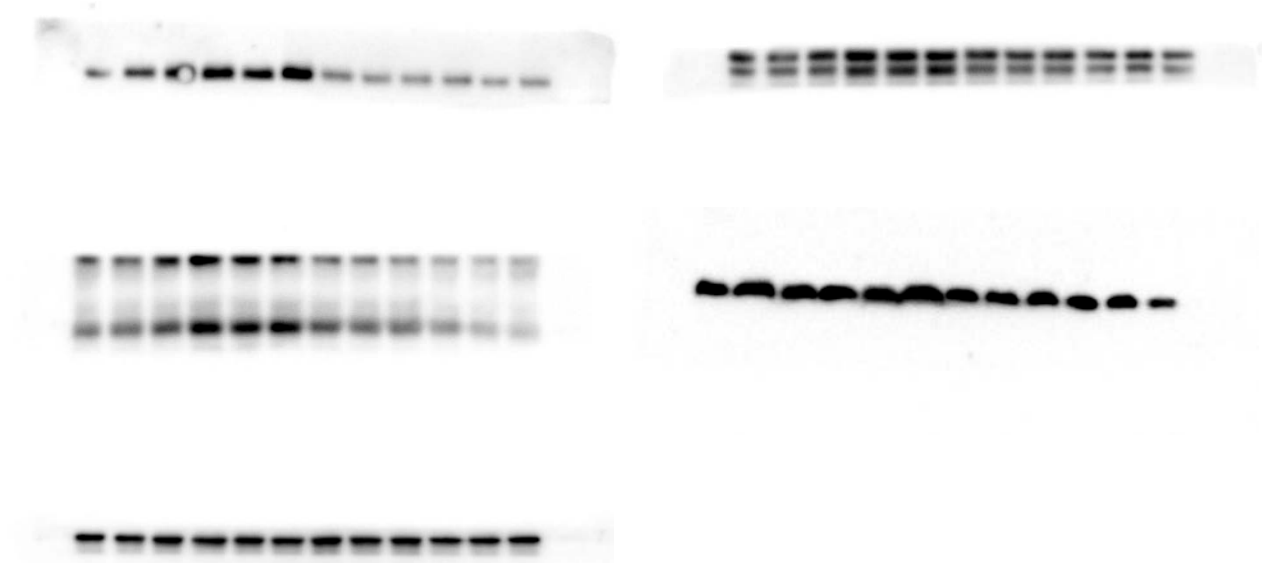

**Supplementary Figure S11.** Original Western blot images in Figure 7H.

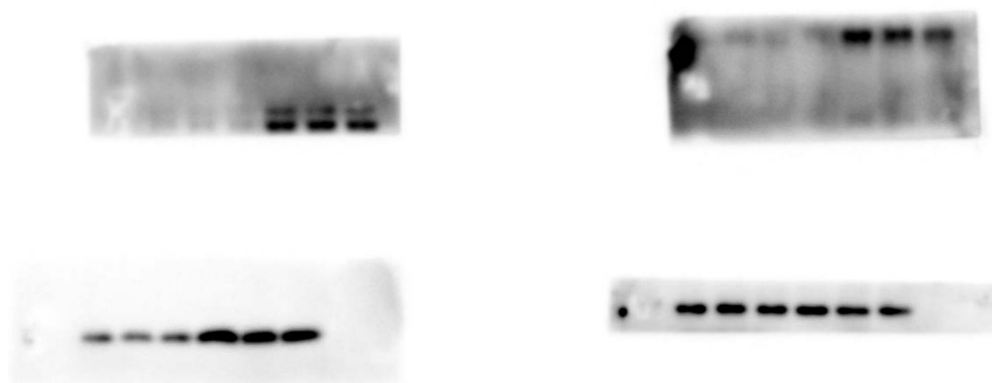

Supplement: s1 [file s1]
